# Supplementary material for: Associations between sex work laws and sex workers’ health: A systematic review and meta-analysis of quantitative and qualitative studies
Source: PLoS Med. 2018 Dec 11;15(12):e1002680. doi: 10.1371/journal.pmed.1002680 (PMC6289426; doi:10.1371/journal.pmed.1002680)
Supplement: S2 Table — (XLSX) [file pmed.1002680.s007.xlsx]

## Sheet: Data for R
studyno	estno	author	study_id	adjusted	country	sample	popn	StudyDes	crimdef	crimdefgp	outcome	outcomegp	time	outcomedesc	outcomeprevInc	event.e	n.e	event.c	n.c	effectuni	effectadj	effect	lci	uci	crimdefgp3	enforcgp	partnertype	policy	group	ln_OR	ln_lci	ln_uci	selogor	repression	selfreport	hiv	sti	partcondom2	stimain	stisub	violmain	violsub	condmain	condsub	condsub2	s
1	1	Beattie, 2015	Beattie, 2015 (1)	1	India	5792	FSW	Cross sectional	Arrested in past one year	recent arrest	HIV infection	HIVSTI		HIV infection	Prevalent	38	123	457	3291	2.26 (1.46-3.48)	1.91 (1.17-3.12)	2.26	1.46	3.48	Recent arrest or prison	lawful enforcement		Partial	1	0.815365	0.378436	1.24703	0.221581	Recent lawful/unlawful arrest or prison	0	1	0		1	1	NA	NA	NA	NA
1	1	Beattie, 2015	Beattie, 2015 (1)	0	India	5792	FSW	Cross sectional	Arrested in past one year	recent arrest	HIV infection	HIVSTI		HIV infection	Prevalent	38	123	457	3291	2.26 (1.46-3.48)	1.91 (1.17-3.12)	1.91	1.17	3.12	Recent arrest or prison	lawful enforcement		Partial	1	0.647103	0.157004	1.13783	0.250212	Recent lawful/unlawful arrest or prison	0	1	0		1	1	NA	NA	NA	NA
1	2	Beattie, 2015	Beattie, 2015 (3)	1	India	5792	FSW	Cross sectional	Arrested in past one year	recent arrest	Chlamydia	HIVSTI		Chlamydia	Prevalent	20	141	206	3542	2.42 (1.27-4.60)	1.80 (0.92-3.53)	2.42	1.27	4.6	Recent arrest or prison	lawful enforcement		Partial	3	0.883768	0.239017	1.52606	0.328326	Recent lawful/unlawful arrest or prison	0	0	1		NA	NA	NA	NA	NA	NA
1	2	Beattie, 2015	Beattie, 2015 (3)	0	India	5792	FSW	Cross sectional	Arrested in past one year	recent arrest	Chlamydia	HIVSTI		Chlamydia	Prevalent	20	141	206	3542	2.42 (1.27-4.60)	1.80 (0.92-3.53)	1.8	0.92	3.53	Recent arrest or prison	lawful enforcement		Partial	3	0.587787	-0.0833816	1.2613	0.34303	Recent lawful/unlawful arrest or prison	0	0	1		NA	NA	NA	NA	NA	NA
1	3	Beattie, 2015	Beattie, 2015 (4)	1	India	5792	FSW	Cross sectional	Arrested in past one year	recent arrest	Gonorrhoea	HIVSTI		Gonorrhoea	Prevalent	14	147	79	3669	4.51 (1.83-11.09)	2.69 (0.96-7.56)	4.51	1.83	11.09	Recent arrest or prison	lawful enforcement		Partial	4	1.5063	0.604316	2.40604	0.459624	Recent lawful/unlawful arrest or prison	0	0	0		NA	NA	NA	NA	NA	NA
1	3	Beattie, 2015	Beattie, 2015 (4)	0	India	5792	FSW	Cross sectional	Arrested in past one year	recent arrest	Gonorrhoea	HIVSTI		Gonorrhoea	Prevalent	14	147	79	3669	4.51 (1.83-11.09)	2.69 (0.96-7.56)	2.69	0.96	7.56	Recent arrest or prison	lawful enforcement		Partial	4	0.989541	-0.040822	2.02287	0.526452	Recent lawful/unlawful arrest or prison	0	0	0		NA	NA	NA	NA	NA	NA
1	4	Beattie, 2015	Beattie, 2015 (5)	1	India	5792	FSW	Cross sectional	Arrested in past one year	recent arrest	Reactive syphilis	HIVSTI		Reactive syphilis	Prevalent	26	135	217	3531	3.12 (1.93-5.06)	2.63 (1.54-4.15)	3.12	1.93	5.06	Recent arrest or prison	lawful enforcement		Partial	5	1.13783	0.65752	1.62137	0.245879	Recent lawful/unlawful arrest or prison	0	0	1		NA	NA	NA	NA	NA	NA
1	4	Beattie, 2015	Beattie, 2015 (5)	0	India	5792	FSW	Cross sectional	Arrested in past one year	recent arrest	Reactive syphilis	HIVSTI		Reactive syphilis	Prevalent	26	135	217	3531	3.12 (1.93-5.06)	2.63 (1.54-4.15)	2.63	1.54	4.15	Recent arrest or prison	lawful enforcement		Partial	5	0.966984	0.431782	1.42311	0.252889	Recent lawful/unlawful arrest or prison	0	0	1		NA	NA	NA	NA	NA	NA
1		Beattie, 2015	Beattie, 2015 (2)	1	India	5792	FSW	Cross sectional	Arrested in past one year	recent arrest	Did not use a condom with last sex client	Condom use	Last client	Condomless sex (client)						0.67 (0.39-1.15)	0.57 (0.33-1.01)	1.49	0.87	2.56	Recent arrest or prison	lawful enforcement	Clients or others	Partial	2	0.398776	-0.139262	0.940007	0.275324	Recent lawful/unlawful arrest or prison				Clients or others	NA	NA	NA	NA	1	1	1
1		Beattie, 2015	Beattie, 2015 (2)	0	India	5792	FSW	Cross sectional	Arrested in past one year	recent arrest	Did not use a condom with last sex client	Condom use	Last client	Condomless sex (client)						0.67 (0.39-1.15)	0.57 (0.33-1.01)	1.75439	0.990099	3.0303	Recent arrest or prison	lawful enforcement	Clients or others	Partial	2	0.562119	-0.00995033	1.10866	0.28536	Recent lawful/unlawful arrest or prison				Clients or others	NA	NA	NA	NA	1	1	1
1		Beattie, 2015	Beattie, 2015 (3)	1	India	5792	FSW	Cross sectional	Arrested in past one year	recent arrest	Did not use a condom with last regular partner	Condom use	Last regular partner	Condomless sex (regular partner)						1.16 (0.77-1.75)	1.01 (0.61, 1.69)	0.86	0.57	1.3	Recent arrest or prison	lawful enforcement	Intimate partner	Partial	3	-0.150823	-0.562119	0.262364	0.210327	Recent lawful/unlawful arrest or prison				Intimate partner	NA	NA	NA	NA	NA	NA	1
1		Beattie, 2015	Beattie, 2015 (3)	0	India	5792	FSW	Cross sectional	Arrested in past one year	recent arrest	Did not use a condom with last regular partner	Condom use	Last regular partner	Condomless sex (regular partner)						1.16 (0.77-1.75)	1.01 (0.61, 1.69)	0.990099	0.591716	1.63934	Recent arrest or prison	lawful enforcement	Intimate partner	Partial	3	-0.00995033	-0.524729	0.494296	0.259955	Recent lawful/unlawful arrest or prison				Intimate partner	NA	NA	NA	NA	NA	NA	1
2	5	Beletsky, 2013	Beletsky, 2013 (1)	1	Mexico	624	FSW IDU	Cross sectional	Confiscation of syringes by police in the last 6 months	confiscation	HIV infection	HIVSTI		HIV infection	Prevalent	22	279	12	311	2.35 (1.09-5.07)	2.54 (1.11-5.8)	2.35	1.09	5.07	Confiscation	lawful enforcement		Registration	1	0.854415	0.0861777	1.62334	0.392133	Confiscation of needles/syringes or condoms	0	1	0		1	1	NA	NA	NA	NA	1
2	5	Beletsky, 2013	Beletsky, 2013 (1)	0	Mexico	624	FSW IDU	Cross sectional	Confiscation of syringes by police in the last 6 months	confiscation	HIV infection	HIVSTI		HIV infection	Prevalent	22	279	12	311	2.35 (1.09-5.07)	2.54 (1.11-5.8)	2.54	1.11	5.8	Confiscation	lawful enforcement		Registration	1	0.932164	0.10436	1.75786	0.421811	Confiscation of needles/syringes or condoms	0	1	0		1	1	NA	NA	NA	NA	1
2	6	Beletsky, 2013	Beletsky, 2013 (2)	1	Mexico	624	FSW IDU	Cross sectional	Confiscation of syringes by police in the last 6 months	confiscation	Syphilis infection (based on titer>=1:8)	HIVSTI		Syphilis	Prevalent	29	272	35	288	1.54 (1.07-2.20)		1.54	1.07	2.2	Confiscation	lawful enforcement		Registration	2	0.431782	0.0676586	0.788457	0.183877	Confiscation of needles/syringes or condoms	0	0	1		NA	NA	NA	NA	NA	NA	1
2	7	Beletsky, 2013	Beletsky, 2013 (3)	1	Mexico	624	FSW IDU	Cross sectional	Confiscation of syringes by police in the last 6 months	confiscation	Any STI	HIVSTI		Any STI infection	Prevalent	186	115	175	148	1.37 (0.99-1.88)		1.37	0.99	1.88	Confiscation	lawful enforcement		Registration	3	0.314811	-0.0100503	0.631272	0.163603	Confiscation of needles/syringes or condoms	0	0	1		NA	NA	NA	NA	NA	NA	1
2	25	Beletsky, 2013	Beletsky, 2013 (1)	1	Mexico	624	FSW IDU	Cross sectional	Confiscation of syringes by police in the last 6 months	confiscation	Police officer has asked you for sexual favours in the last 6 months	Violence		Sexual violence (police)	Prevalent					5.86 (4.01-8.56)		5.86	4.01	8.56	Confiscation	lawful enforcement	Police	Registration	1	1.76815	1.38879	2.1471	0.193446	Confiscation of needles/syringes or condoms					NA	NA	NA	NA	NA	NA
2	26	Beletsky, 2013	Beletsky, 2013 (2)	1	Mexico	624	FSW IDU	Cross sectional	Confiscation of syringes by police in the last 6 months	confiscation	Sexually abused by a police officer in the last 6 months	Violence		Sexual violence (police)	Prevalent					11.77 (6.29-22.01)	12.76 (6.58-24.2)	11.77	6.29	22.01	Confiscation	lawful enforcement	Police	Registration	2	2.46555	1.83896	3.0915	0.319524	Confiscation of needles/syringes or condoms					NA	NA	1	1	NA	NA
2	26	Beletsky, 2013	Beletsky, 2013 (2)	0	Mexico	624	FSW IDU	Cross sectional	Confiscation of syringes by police in the last 6 months	confiscation	Sexually abused by a police officer in the last 6 months	Violence		Sexual violence (police)	Prevalent					11.77 (6.29-22.01)	12.76 (6.58-24.2)	12.76	6.58	24.2	Confiscation	lawful enforcement	Police	Registration	2	2.54632	1.88403	3.18635	0.332224	Confiscation of needles/syringes or condoms					NA	NA	1	1	NA	NA
3	8	Braunstein, 2012	Braunstein, 2012 (1)	0	Rwanda	192	FSW	Cross sectional	Ever imprisoned	ever prison	HIV prevalence	HIVSTI		HIV infection	Prevalent	89	103	77	134	n/a	1.8 (1.3-2.6)	1.8	1.3	2.6	Ever experienced arrest or prison	lawful enforcement		Full	1	0.587787	0.262364	0.955511	0.176823	Ever experienced lawful/unlawful arrest or prison	0	1	0		1	1	NA	NA	NA	NA	1
4	9	Chen, 2012	Chen, 2012 (1)	1	Mexico	200	FSW	Cross sectional	Ever arrested	ever arrest	STI symptoms (having had genital/anal warts, genital ulcers or sores, genital itching or abnormal vaginal discharge in the past 6 months)	HIVSTI		STI symptoms	Prevalent					2.46 (1.14-5.31)	2.26 (1.02-5.02)	2.46	1.14	5.31	Ever experienced arrest or prison	lawful enforcement		Registration	1	0.900161	0.131028	1.66959	0.392491	Ever experienced lawful/unlawful arrest or prison	1	0	0		1	1	NA	NA	NA	NA	1
4	9	Chen, 2012	Chen, 2012 (1)	0	Mexico	200	FSW	Cross sectional	Ever arrested	ever arrest	STI symptoms (having had genital/anal warts, genital ulcers or sores, genital itching or abnormal vaginal discharge in the past 6 months)	HIVSTI		STI symptoms	Prevalent					2.46 (1.14-5.31)	2.26 (1.02-5.02)	2.26	1.02	5.02	Ever experienced arrest or prison	lawful enforcement		Registration	1	0.815365	0.0198026	1.61343	0.406538	Ever experienced lawful/unlawful arrest or prison	1	0	0		1	1	NA	NA	NA	NA	1
4	10	Chen, 2012	Chen, 2012 (2)	1	Mexico	200	FSW	Cross sectional	Arrested in the last year	recent arrest	STI symptoms (having had genital/anal warts, genital ulcers or sores, genital itching or abnormal vaginal discharge in the past 6 months)	HIVSTI		STI symptoms	Prevalent					2.23 (0.93-5.39)		2.23	0.93	5.39	Recent arrest or prison	lawful enforcement		Registration	2	0.802002	-0.0725707	1.68455	0.448244	Recent lawful/unlawful arrest or prison	1	0	0		NA	1	NA	NA	NA	NA
5	11	Decker, 2012	Decker, 2012 (5)	0	Russia	147	FSW	Cross sectional	Subotnik (sex demanded by police in exchange for leniency towards pimps and FSWs) in past 3 months	Sexual or physical coercion	Any STI/HIV	HIVSTI		Any STI/HIV infection	Prevalent					n/a	2.50 (1.17-5.37)	2.5	1.17	5.37	Sexual or physical violence from police	unlawful enforcement		Partial	5	0.916291	0.157004	1.68083	0.388731	Sexual or physical violence from police	0	0	1		1	1	NA	NA	NA	NA
6	14	Erausquin, 2015	Erausquin, 2015 (3)	0	India	1680	FSW	Cross sectional	Police took condoms away (last 6 months)	confiscation	STI symptoms (6 months prior to survey including abdominal pain not relating to diarrhea or menses; foul smelling vaginal discharge, pain while urinating, genital ulcers/sores, swelling in groin area or itching)	HIVSTI		STI symptoms	Prevalent						2.42 (1.64-3.57)	2.42	1.64	3.57	Confiscation	lawful enforcement		Partial	3	0.883768	0.494696	1.27257	0.198436	Confiscation of needles/syringes or condoms	1	0	0		NA	1	NA	NA	NA	NA	1
6	13	Erausquin, 2015	Erausquin, 2015 (2)	0	India	1680	FSW	Cross sectional	Gave gifts to police to avoid trouble (last 6 months)	extortion	STI symptoms (6 months prior to survey including abdominal pain not relating to diarrhea or menses; foul smelling vaginal discharge, pain while urinating, genital ulcers/sores, swelling in groin area or itching)	HIVSTI		STI symptoms	Prevalent						2.4 (180-3.21)	2.4	1.8	3.21	Extortion	unlawful enforcement		Partial	2	0.875469	0.587787	1.16627	0.147573	Financial extortion	1	0	0		NA	1	NA	NA	NA	NA
6	15	Erausquin, 2015	Erausquin, 2015 (4)	0	India	1680	FSW	Cross sectional	Experienced a workplace raid (last 6 months)	raid	STI symptoms (6 months prior to survey including abdominal pain not relating to diarrhea or menses; foul smelling vaginal discharge, pain while urinating, genital ulcers/sores, swelling in groin area or itching)	HIVSTI		STI symptoms	Prevalent						2.21 (1.77-2.77)	2.21	1.77	2.77	Police repression on sex work environment	lawful enforcement		Partial	4	0.792993	0.57098	1.01885	0.114252	Police repression on sex work environment	1	0	0		NA	1	NA	NA	NA	NA
6	16	Erausquin, 2015	Erausquin, 2015 (5)	0	India	1680	FSW	Cross sectional	Ever arrested (last 6 months)	recent arrest	STI symptoms (6 months prior to survey including abdominal pain not relating to diarrhea or menses; foul smelling vaginal discharge, pain while urinating, genital ulcers/sores, swelling in groin area or itching)	HIVSTI		STI symptoms	Prevalent						1.74 (1.30-233)	1.74	1.3	2.33	Recent arrest or prison	lawful enforcement		Partial	5	0.553885	0.262364	0.845868	0.148853	Recent lawful/unlawful arrest or prison	1	0	0		1	1	NA	NA	NA	NA
6	12	Erausquin, 2015	Erausquin, 2015 (1)	0	India	1680	FSW	Cross sectional	Had sex with police to avoid trouble in the last 6 months	Sexual or physical coercion	STI symptoms (6 months prior to survey including abdominal pain not relating to diarrhea or menses; foul smelling vaginal discharge, pain while urinating, genital ulcers/sores, swelling in groin area or itching)	HIVSTI		STI symptoms	Prevalent						2.23 (1.60-3.11)	2.23	1.6	3.11	Sexual or physical violence from police	unlawful enforcement		Partial	1	0.802002	0.470004	1.13462	0.169546	Sexual or physical violence from police	1	0	0		NA	1	NA	NA	NA	NA
6		Erausquin, 2015	Erausquin, 2015 (3)	0	India	1680	FSW	Cross sectional	Police took condoms away (last 6 months)	confiscation	Inconsistent condom use with clients (7 days prior to survey)	Condom use	Last week	Any condomless sex (client)	Prevalent						1.72 (1.18-2.51)	1.72	1.18	2.51	Confiscation	lawful enforcement	Clients or others	Partial	3	0.542324	0.165514	0.920283	0.192543	Confiscation of needles/syringes or condoms				Clients or others	NA	NA	NA	NA	NA	1	NA
6		Erausquin, 2015	Erausquin, 2015 (8)	0	India	1680	FSW	Cross sectional	Police took condoms away (last 6 months)	confiscation	Accepted more money for sex without a condom (6 months prior to survey)	Condom use	Last 6 months	Any condomless sex (client, for money)	Prevalent						3.83 (2.61-5.61)	3.83	2.61	5.61	Confiscation	lawful enforcement	Clients or others	Partial	8	1.34286	0.95935	1.72455	0.195204	Confiscation of needles/syringes or condoms				Clients or others	NA	NA	NA	NA	NA	NA	NA
6		Erausquin, 2015	Erausquin, 2015 (2)	0	India	1680	FSW	Cross sectional	Gave gifts to police to avoid trouble (last 6 months)	extortion	Inconsistent condom use with clients (7 days prior to survey)	Condom use	Last week	Any condomless sex (client)							1.59 (1.19-2.12)	1.59	1.19	2.12	Extortion	unlawful enforcement	Clients or others	Partial	2	0.463734	0.173953	0.751416	0.147312	Financial extortion				Clients or others	NA	NA	NA	NA	NA	1	NA
6		Erausquin, 2015	Erausquin, 2015 (7)	0	India	1680	FSW	Cross sectional	Gave gifts to police to avoid trouble (last 6 months)	extortion	Accepted more money for sex without a condom (6 months prior to survey)	Condom use	Last 6 months	Any condomless sex (client, for money)							2.46 (1.82-3.53)	2.46	1.82	3.53	Extortion	unlawful enforcement	Clients or others	Partial	7	0.900161	0.598836	1.2613	0.168995	Financial extortion				Clients or others	NA	NA	NA	NA	NA	NA	NA
6		Erausquin, 2015	Erausquin, 2015 (4)	0	India	1680	FSW	Cross sectional	Experienced a workplace raid (last 6 months)	raid	Inconsistent condom use with clients (7 days prior to survey)	Condom use	Last week	Any condomless sex (client)							1.13 (0.89-1.42)	1.13	0.89	1.42	Police repression on sex work environment	lawful enforcement	Clients or others	Partial	4	0.122218	-0.116534	0.350657	0.119181	Police repression on sex work environment				Clients or others	NA	NA	NA	NA	NA	1	NA
6		Erausquin, 2015	Erausquin, 2015 (9)	0	India	1680	FSW	Cross sectional	Experienced a workplace raid (last 6 months)	raid	Accepted more money for sex without a condom (6 months prior to survey)	Condom use	Last 6 months	Any condomless sex (client, for money)							1.57 (1.21-2.13)	1.57	1.21	2.13	Police repression on sex work environment	lawful enforcement	Clients or others	Partial	9	0.451076	0.19062	0.756122	0.144261	Police repression on sex work environment				Clients or others	NA	NA	NA	NA	NA	NA	NA
6		Erausquin, 2015	Erausquin, 2015 (10)	0	India	1680	FSW	Cross sectional	Ever arrested (last 6 months)	recent arrest	Accepted more money for sex without a condom (6 months prior to survey)	Condom use	Last 6 months	Any condomless sex (client, for money)							1.53 (1.11-2.13)	1.53	1.11	2.13	Recent arrest or prison	lawful enforcement	Clients or others	Partial	10	0.425268	0.10436	0.756122	0.166266	Recent lawful/unlawful arrest or prison				Clients or others	NA	NA	NA	NA	NA	NA	1
6		Erausquin, 2015	Erausquin, 2015 (5)	0	India	1680	FSW	Cross sectional	Ever arrested (last 6 months)	recent arrest	Inconsistent condom use with clients (7 days prior to survey)	Condom use	Last week	Any condomless sex (client)							1.20 (0.87-1.63)	1.2	0.87	1.63	Recent arrest or prison	lawful enforcement	Clients or others	Partial	5	0.182322	-0.139262	0.48858	0.160164	Recent lawful/unlawful arrest or prison				Clients or others	NA	NA	NA	NA	1	1	1
6		Erausquin, 2015	Erausquin, 2015 (1)	0	India	1680	FSW	Cross sectional	Had sex with police to avoid trouble in the last 6 months	Sexual or physical coercion	Inconsistent condom use with clients (7 days prior to survey)	Condom use	Last week	Any condomless sex (client)							1.16 (0.83-1.63)	1.16	0.83	1.63	Sexual or physical violence from police	unlawful enforcement	Clients or others	Partial	1	0.14842	-0.18633	0.48858	0.172171	Sexual or physical violence from police				Clients or others	NA	NA	NA	NA	NA	1	NA
6		Erausquin, 2015	Erausquin, 2015 (6)	0	India	1680	FSW	Cross sectional	Had sex with police to avoid trouble in the last 6 months	Sexual or physical coercion	Accepted more money for sex without a condom (6 months prior to survey)	Condom use	Last 6 months	Any condomless sex (client, for money)							2.04 (1.44-2.90)	2.04	1.44	2.9	Sexual or physical violence from police	unlawful enforcement	Clients or others	Partial	6	0.71295	0.364643	1.06471	0.178589	Sexual or physical violence from police				Clients or others	NA	NA	NA	NA	NA	NA	NA
7	17	Estebanez, 1998	Estebanez, 1998 (1)	0	Spain	1067	FSW NIDU	Cross sectional	Ever imprisoned	ever prison	HIV	HIVSTI		HIV infection	Prevalent						1.09 (0.29-4.16)	1.09	0.29	4.16	Ever experienced arrest or prison	lawful enforcement		Partial	1	0.0861777	-1.23787	1.42552	0.679436	Ever experienced lawful/unlawful arrest or prison	0	1	0		1	1	NA	NA	NA	NA	1
7	17	Estebanez, 1998	Estebanez, 1998 (2)	0	Spain	261	FSW IDU	Cross sectional	Ever imprisoned	ever prison	HIV	HIVSTI		HIV infection	Prevalent						1.76 (0.89-3.47)	1.76	0.89	3.47	Ever experienced arrest or prison	lawful enforcement		Partial	2	0.565314	-0.116534	1.24415	0.347114	Ever experienced lawful/unlawful arrest or prison	0	1	0		1	1	NA	NA	NA	NA	1
8	18	Pando, 2013	Pando, 2013 (1)	1	Argentina	1255	FSW	Cross sectional	History of being arrested because of sex work	ever arrest	HIV	HIVSTI		HIV infection	Prevalent					4.4 (1.6-12.0)	1.8 (1.1-3.0)	4.4	1.6	12	Ever experienced arrest or prison	lawful enforcement		Partial	1	1.4816	0.470004	2.48491	0.514006	Ever experienced lawful/unlawful arrest or prison	0	1	0		1	1	NA	NA	NA	NA
8	18	Pando, 2013	Pando, 2013 (1)	0	Argentina	1255	FSW	Cross sectional	History of being arrested because of sex work	ever arrest	HIV	HIVSTI		HIV infection	Prevalent					4.4 (1.6-12.0)	1.8 (1.1-3.0)	1.8	1.1	3	Ever experienced arrest or prison	lawful enforcement		Partial	1	0.587787	0.0953102	1.09861	0.255944	Ever experienced lawful/unlawful arrest or prison	0	1	0		1	1	NA	NA	NA	NA
8	19	Pando, 2013	Pando, 2013 (2)	1	Argentina	1255	FSW	Cross sectional	History of being arrested because of sex work	ever arrest	Treponema Pallidum	HIVSTI		Syphilis	Prevalent					2.1 (1.6-2.8)	1.5 (1.2-1.7)	2.1	1.6	2.8	Ever experienced arrest or prison	lawful enforcement		Partial	2	0.741937	0.470004	1.02962	0.142759	Ever experienced lawful/unlawful arrest or prison	0	0	1		NA	NA	NA	NA	NA	NA
8	19	Pando, 2013	Pando, 2013 (2)	0	Argentina	1255	FSW	Cross sectional	History of being arrested because of sex work	ever arrest	Treponema Pallidum	HIVSTI		Syphilis	Prevalent					2.1 (1.6-2.8)	1.5 (1.2-1.7)	1.5	1.2	1.7	Ever experienced arrest or prison	lawful enforcement		Partial	2	0.405465	0.182322	0.530628	0.0888537	Ever experienced lawful/unlawful arrest or prison	0	0	1		NA	NA	NA	NA	NA	NA
8		Pando, 2013	Pando, 2013 (1)	1	Argentina	1255	FSW	Cross sectional	History of being arrested because of sex work	ever arrest	Irregular ( not always) use of condoms with partner	Condom use	Not reported	Any condomless sex (partner)						1.3 (0.9-2.0)	1.0 (0.8-1.3)	1.3	0.9	2	Ever experienced arrest or prison	lawful enforcement	Intimate partner	Partial	1	0.262364	-0.105361	0.693147	0.203701	Ever experienced lawful/unlawful arrest or prison				Intimate partner	NA	NA	NA	NA	NA	NA	1
8		Pando, 2013	Pando, 2013 (1)	0	Argentina	1255	FSW	Cross sectional	History of being arrested because of sex work	ever arrest	Irregular ( not always) use of condoms with partner	Condom use	Not reported	Any condomless sex (partner)						1.3 (0.9-2.0)	1.0 (0.8-1.3)	1	0.8	1.3	Ever experienced arrest or prison	lawful enforcement	Intimate partner	Partial	1	0	-0.223144	0.262364	0.123854	Ever experienced lawful/unlawful arrest or prison				Intimate partner	NA	NA	NA	NA	NA	NA	1
8		Pando, 2013	Pando, 2013 (2)	1	Argentina	1255	FSW	Cross sectional	History of being arrested because of sex work	ever arrest	Irregular ( not always) use of condoms with client	Condom use	Not reported	Any condomless sex (client)						1.9 (1.3-2.7)	1.1 (0.9-1.4)	1.9	1.3	2.7	Ever experienced arrest or prison	lawful enforcement	Clients or others	Partial	2	0.641854	0.262364	0.993252	0.186451	Ever experienced lawful/unlawful arrest or prison				Clients or others	NA	NA	NA	NA	1	1	1
8		Pando, 2013	Pando, 2013 (2)	0	Argentina	1255	FSW	Cross sectional	History of being arrested because of sex work	ever arrest	Irregular ( not always) use of condoms with client	Condom use	Not reported	Any condomless sex (client)						1.9 (1.3-2.7)	1.1 (0.9-1.4)	1.1	0.9	1.4	Ever experienced arrest or prison	lawful enforcement	Clients or others	Partial	2	0.0953102	-0.105361	0.336472	0.112712	Ever experienced lawful/unlawful arrest or prison				Clients or others	NA	NA	NA	NA	1	1	1
9	20	Platt, 2011	Platt, 2011 (1)	1	UK	268	FSW	Cross sectional	Ever been arrested or in prison	ever arrest or prison	STI/HIV (past infections: HIV Treponema Pallidum; Acute infections: Chlamydia or Gonorrhoea)	HIVSTI		Any STI/HIV infection	Prevalent					1.3 (0.49-3.5)	2.0 (0.58-7.18)	1.3	0.49	3.5	Ever experienced arrest or prison	lawful enforcement		Partial	1	0.262364	-0.71335	1.25276	0.501559	Ever experienced lawful/unlawful arrest or prison	0	0	1		1	1	NA	NA	NA	NA
9	20	Platt, 2011	Platt, 2011 (1)	0	UK	268	FSW	Cross sectional	Ever been arrested or in prison	ever arrest or prison	STI/HIV (past infections: HIV Treponema Pallidum; Acute infections: Chlamydia or Gonorrhoea)	HIVSTI		Any STI/HIV infection	Prevalent					1.3 (0.49-3.5)	2.0 (0.58-7.18)	2	0.58	7.18	Ever experienced arrest or prison	lawful enforcement		Partial	1	0.693147	-0.544727	1.9713	0.641843	Ever experienced lawful/unlawful arrest or prison	0	0	1		1	1	NA	NA	NA	NA
9	34	Platt, 2011	Platt, 2011 (1)	1	UK	268	FSW	Cross sectional	Ever been arrested or in prison	ever arrest or prison	Physical violence from clients in the last 12 months (reporting one of more of the following: robbed, hit, beaten, threatened, attached with a weapon, kidnapped)	Violence		Physical violence (client)	Prevalent					2.0 (1.06-3.93)	2.6 (1.14-5.71)	2	1.06	3.93	Ever experienced arrest or prison	lawful enforcement	Clients or other perpetrators	Partial	1	0.693147	0.0582689	1.36864	0.334278	Ever experienced lawful/unlawful arrest or prison					NA	NA	1	1	NA	NA
9	34	Platt, 2011	Platt, 2011 (1)	0	UK	268	FSW	Cross sectional	Ever been arrested or in prison	ever arrest or prison	Physical violence from clients in the last 12 months (reporting one of more of the following: robbed, hit, beaten, threatened, attached with a weapon, kidnapped)	Violence		Physical violence (client)	Prevalent					2.0 (1.06-3.93)	2.6 (1.14-5.71)	2.6	1.14	5.71	Ever experienced arrest or prison	lawful enforcement	Clients or other perpetrators	Partial	1	0.955511	0.131028	1.74222	0.411018	Ever experienced lawful/unlawful arrest or prison					NA	NA	1	1	NA	NA
10	21	Socias, 2015	Socias, 2015 (1)	1	Canada	720	FSW and trans women SW	Prospective cohort	Recent incarceration (in the last 6 months, have you been in detention, prison or jail overnight or longer?)	recent prison	HIV infected	HIVSTI		HIV infection	Incident?					1.26 (0.80-2.00)		1.26	0.8	2	Recent arrest or prison	lawful enforcement		Partial	1	0.231112	-0.223144	0.693147	0.233748	Recent lawful/unlawful arrest or prison	0	1	0		1	1	NA	NA	NA	NA
10	22	Socias, 2015	Socias, 2015 (2)	1	Canada	720	FSW and trans women SW	Prospective cohort	Recent incarceration (in the last 6 months, have you been in detention, prison or jail overnight or longer?)	recent prison	HCV infected	HIVSTI		HCV infection	Incident					1.60 (1.15-2.22)		1.6	1.15	2.22	Recent arrest or prison	lawful enforcement		Partial	2	0.470004	0.139762	0.797507	0.167792	Recent lawful/unlawful arrest or prison	0	0	0		NA	NA	NA	NA	NA	NA
11	24	Strathdee, 2011	Strathdee, 2011 (2)	1	Mexico	620	FSW IDU	Cross sectional	Police confiscated syringes instead of arrest	confiscation	HIV prevalence	HIVSTI		HIV infection	Prevalent					2.38 (1.17-4.81)	2.4 (1.16-6.52)	2.38	1.17	4.81	Confiscation	lawful enforcement		Registration	2	0.8671	0.157004	1.5707	0.360636	Confiscation of needles/syringes or condoms	0	1	0		1	1	NA	NA	NA	NA	1
11	24	Strathdee, 2011	Strathdee, 2011 (2)	0	Mexico	620	FSW IDU	Cross sectional	Police confiscated syringes instead of arrest	confiscation	HIV prevalence	HIVSTI		HIV infection	Prevalent					2.38 (1.17-4.81)	2.4 (1.16-6.52)	2.4	1.16	6.52	Confiscation	lawful enforcement		Registration	2	0.875469	0.14842	1.87487	0.440422	Confiscation of needles/syringes or condoms	0	1	0		1	1	NA	NA	NA	NA	1
11	23	Strathdee, 2011	Strathdee, 2011 (1)	1	Mexico	620	FSW IDU	Cross sectional	Police solicited bribes instead of arresting	extortion	HIV prevalence	HIVSTI		HIV infection	Prevalent					1.61 (0.73-3.52)		1.61	0.73	3.52	Extortion	unlawful enforcement		Registration	1	0.476234	-0.314711	1.25846	0.401319	Financial extortion	0	1	0		NA	1	NA	NA	NA	NA
12	27	Deering, 2013	Deering, 2013 (1)	0	India	1219	FSW	Cross sectional	Arrested in the last year	recent arrest	Experienced physical or sexual violence by a client in the last year (	Violence		Physical violence (client)	Prevalent						1.84 (1.02-3.31)	1.84	1.02	3.31	Recent arrest or prison	lawful enforcement	Clients or other perpetrators	Partial	1	0.609766	0.0198026	1.19695	0.300292	Recent lawful/unlawful arrest or prison					NA	NA	1	1	NA	NA
13	30	Erausquin, 2011	Erausquin, 2011 (3)	0	India	835	FSW	Cross sectional	Police took condoms away (last 6 months)	confiscation	Clients perpetrated sexual or physical violence	Violence		Sexual/physical violence (client)	Prevalent						5.62 (3.22-9.82)	5.62	3.22	9.82	Confiscation	lawful enforcement	Clients or other perpetrators	Partial	3	1.72633	1.16938	2.28442	0.284449	Confiscation of needles/syringes or condoms					NA	NA	NA	1	NA	NA
13	28	Erausquin, 2011	Erausquin, 2011 (1)	0	India	835	FSW	Cross sectional	Gave gifts to police to avoid trouble (last 6 months)	extortion	Clients perpetrated sexual or physical violence	Violence		Sexual/physical violence (client)	Prevalent						3.16 (2.00-4.96)	3.16	2	4.96	Extortion	unlawful enforcement	Clients or other perpetrators	Partial	1	1.15057	0.693147	1.60141	0.231699	Financial extortion					NA	NA	NA	1	NA	NA
13	32	Erausquin, 2011	Erausquin, 2011 (5)	0	India	835	FSW	Cross sectional	Experienced a workplace raid (last 6 months)	raid	Clients perpetrated sexual or physical violence	Violence		Sexual/physical violence (client)	Prevalent						4.64 (3.16-6.81)	4.64	3.16	6.81	Police repression on sex work environment	lawful enforcement	Clients or other perpetrators	Partial	5	1.53471	1.15057	1.91839	0.195872	Police repression on sex work environment					NA	NA	NA	1	NA	NA
13	31	Erausquin, 2011	Erausquin, 2011 (4)	0	India	835	FSW	Cross sectional	Ever arrested (last 6 months)	recent arrest	Clients perpetrated sexual or physical violence	Violence		Sexual/physical violence (client)	Prevalent						7.14 (4.45-11.44)	7.14	4.45	11.44	Recent arrest or prison	lawful enforcement	Clients or other perpetrators	Partial	4	1.96571	1.4929	2.43712	0.24087	Recent lawful/unlawful arrest or prison					NA	NA	1	1	NA	NA
13	29	Erausquin, 2011	Erausquin, 2011 (2)	0	India	835	FSW	Cross sectional	Had sex with police to avoid trouble in the last 6 months	Sexual or physical coercion	Clients perpetrated sexual or physical violence	Violence		Sexual/physical violence (client)	Prevalent						3.05 (1.89-4.93)	3.05	1.89	4.93	Sexual or physical violence from police	unlawful enforcement	Clients or other perpetrators	Partial	2	1.11514	0.636577	1.59534	0.244582	Sexual or physical violence from police					NA	NA	NA	1	NA	NA
14	33	Odinokova, 2014	Odinokova, 2014 (1)	0	Russia	896	FSW	Cross sectional	Sexual coercion in context of police contact in the last 12 months	Sexual or physical coercion	Rape during sex work (ever)	Violence		Sexual violence (client)	Prevalent						2.09 (1.46-2.99)	2.09	1.4	2.99	Sexual or physical violence from police	unlawful enforcement	Clients or other perpetrators	Partial	1	0.737164	0.336472	1.09527	0.193572	Sexual or physical violence from police					NA	NA	1	1	NA	NA
15		Shannon, 2009	Shannon (AJPH), 2009 (3)	1	Canada	205	FSW	Cross sectional	Experiencing harassment by security guards	Sexual or physical coercion	Being pressured by a client into unprotected vaginal or or anal intercourse in the past 6 months	Violence		Sexual violence (client)	Incident					1.75 (0.91-3.38)	1.56 (0.85-3.10)	1.75	0.91	3.38	Police repression on sex work environment		Clients or other perpetrators	Partial	3	0.559616	-0.0943107	1.21788	0.334741	Police repression on sex work environment					NA	NA	NA	NA	NA	NA
15		Shannon, 2009	Shannon (AJPH), 2009 (3)	0	Canada	205	FSW	Cross sectional	Experiencing harassment by security guards	Sexual or physical coercion	Being pressured by a client into unprotected vaginal or or anal intercourse in the past 6 months	Violence		Sexual violence (client)	Incident					1.75 (0.91-3.38)	1.56 (0.85-3.10)	1.56	0.85	3.1	Police repression on sex work environment		Clients or other perpetrators	Partial	3	0.444686	-0.162519	1.1314	0.330082	Police repression on sex work environment					NA	NA	NA	NA	NA	NA
15	35	Shannon, 2009	Shannon (AJPH), 2009 (1)	1	Canada	205	FSW	Cross sectional	Having moved working areas away from DTES or main streets because of policing	relocate	Being pressured by a client into unprotected vaginal or or anal intercourse in the past 6 months	Violence		Sexual violence (client)	Incident					3.29 (1.42-7.63)	3.10 (1.39-7.44)	3.29	1.42	7.63	Police repression on sex work environment	lawful enforcement	Clients or other perpetrators	Partial	1	1.19089	0.350657	2.03209	0.428936	Police repression on sex work environment					NA	NA	NA	NA	NA	NA
15	35	Shannon, 2009	Shannon (AJPH), 2009 (1)	0	Canada	205	FSW	Cross sectional	Having moved working areas away from DTES or main streets because of policing	relocate	Being pressured by a client into unprotected vaginal or or anal intercourse in the past 6 months	Violence		Sexual violence (client)	Incident					3.29 (1.42-7.63)	3.10 (1.39-7.44)	3.1	1.39	7.44	Police repression on sex work environment	lawful enforcement	Clients or other perpetrators	Partial	1	1.1314	0.329304	2.00687	0.427951	Police repression on sex work environment					NA	NA	NA	NA	NA	NA
15		Shannon, 2009	Shannon (AJPH), 2009 (2)	1	Canada	205	FSW	Cross sectional	Having a zoning restriction because of previous solicitation or drug charges	relocate	Being pressured by a client into unprotected vaginal or or anal intercourse in the past 6 months	Violence		Sexual violence (client)	Incident					3.45 (1.29-9.25)	3.39 (1.20-4.98)	3.45	1.29	9.25	Police repression on sex work environment	lawful enforcement	Clients or other perpetrators	Partial	2	1.23837	0.254642	2.22462	0.502546	Police repression on sex work environment					NA	NA	NA	NA	NA	NA
15		Shannon, 2009	Shannon (AJPH), 2009 (2)	0	Canada	205	FSW	Cross sectional	Having a zoning restriction because of previous solicitation or drug charges	relocate	Being pressured by a client into unprotected vaginal or or anal intercourse in the past 6 months	Violence		Sexual violence (client)	Incident					3.45 (1.29-9.25)	3.39 (1.20-4.98)	3.39	1.2	4.98	Police repression on sex work environment	lawful enforcement	Clients or other perpetrators	Partial	2	1.22083	0.182322	1.60543	0.363038	Police repression on sex work environment					NA	NA	NA	NA	NA	NA
16		Shannon, 2009	Shannon, 2009 (2)	1	Canada	237	FSW	Cross sectional	Police confiscated drug use paraphernalia (without arrest)	confiscation	Have you been forced to have sex (penetrative) against your will (excluding clients) in the last 6 months?	Violence		Sexual violence (others)	Prevalent					1.21 (0.73-2.00)	not reported	1.21	0.73	2	Confiscation	lawful enforcement	Intimate partners	Partial	2	0.19062	-0.314711	0.693147	0.257107	Confiscation of needles/syringes or condoms					NA	NA	NA	NA	NA	NA
16		Shannon, 2009	Shannon, 2009 (3)	1	Canada	237	FSW	Cross sectional	Police confiscated drug use paraphernalia (without arrest)	confiscation	Have you been physically abused by someone (excluding clients) in the last 6 months? (includes partner, pimp, dealer, police, security guard, stranger or other)	Violence		Physical violence (others)	Prevalent					1.96 (1.23-3.12)	1.50 (1.02-2.41)	1.96	1.23	3.12	Confiscation	lawful enforcement	Intimate partners	Partial	3	0.672944	0.207014	1.13783	0.237454	Confiscation of needles/syringes or condoms					NA	NA	NA	NA	NA	NA
16		Shannon, 2009	Shannon, 2009 (3)	0	Canada	237	FSW	Cross sectional	Police confiscated drug use paraphernalia (without arrest)	confiscation	Have you been physically abused by someone (excluding clients) in the last 6 months? (includes partner, pimp, dealer, police, security guard, stranger or other)	Violence		Physical violence (others)	Prevalent					1.96 (1.23-3.12)	1.50 (1.02-2.41)	1.5	1.02	2.41	Confiscation	lawful enforcement	Intimate partners	Partial	3	0.405465	0.0198026	0.879627	0.219343	Confiscation of needles/syringes or condoms					NA	NA	NA	1	NA	NA
16		Shannon, 2009	Shannon, 2009 (6)	1	Canada	237	FSW	Cross sectional	Police confiscated drug use paraphernalia (without arrest)	confiscation	Clients perpetrated sexual or physical violence	Violence		Sexual/physical violence (client)	Prevalent					1.34 (0.89-2.17)	not reported	1.34	0.89	2.17	Confiscation	lawful enforcement	Clients or other perpetrators	Partial	6	0.29267	-0.116534	0.774727	0.227362	Confiscation of needles/syringes or condoms					NA	NA	NA	1	NA	NA
16		Shannon, 2009	Shannon, 2009 (1)	1	Canada	237	FSW	Prospective cohort	Moved working areas away from main streets owing to local policing	relocate	Clients perpetrated sexual or physical violence	Violence		Sexual/physical violence (client)	Prevalent					2.15 (1.36-3.40)	2.13 (1.26-3.62)	2.15	1.36	3.4	Police repression on sex work environment	lawful enforcement	Clients or other perpetrators	Partial	1	0.765468	0.307485	1.22378	0.233748	Police repression on sex work environment					NA	NA	1	1	NA	NA
16		Shannon, 2009	Shannon, 2009 (1)	0	Canada	237	FSW	Prospective cohort	Moved working areas away from main streets owing to local policing	relocate	Clients perpetrated sexual or physical violence	Violence		Sexual/physical violence (client)	Prevalent					2.15 (1.36-3.40)	2.13 (1.26-3.62)	2.13	1.26	3.62	Police repression on sex work environment	lawful enforcement	Clients or other perpetrators	Partial	1	0.756122	0.231112	1.28647	0.269225	Police repression on sex work environment					NA	NA	1	1	NA	NA
16		Shannon, 2009	Shannon, 2009 (4)	1	Canada	237	FSW	Prospective cohort	Moved working areas away from main streets owing to local policing	relocate	Have you been forced to have sex (penetrative) against your will (excluding clients) in the last 6 months?	Violence		Sexual violence (others)	Prevalent					1.42 (0.89-2.27)	not reported	1.42	0.89	2.27	Police repression on sex work environment	lawful enforcement	Intimate partners	Partial	4	0.350657	-0.116534	0.81978	0.238856	Police repression on sex work environment					NA	NA	NA	NA	NA	NA
16		Shannon, 2009	Shannon, 2009 (7)	1	Canada	237	FSW	Prospective cohort	Moved working areas away from main streets owing to local policing	relocate	Have you been physically abused by someone (excluding clients) in the last 6 months? (includes partner, pimp, dealer, police, security guard, stranger or other)	Violence		Physical violence (others)	Prevalent					1.87 (0.89-3.05)	not reported	1.87	0.89	3.05	Police repression on sex work environment	lawful enforcement	Intimate partners	Partial	7	0.625938	-0.116534	1.11514	0.314203	Police repression on sex work environment					NA	NA	NA	NA	NA	NA
16		Shannon, 2009	Shannon, 2009 (5)	1	Canada	237	FSW	Prospective cohort	Prior assault by police	Sexual or physical coercion	Clients perpetrated sexual or physical violence	Violence		Sexual/physical violence (client)	Prevalent					4.16 (2.35-7.36)	3.45 (1.98-6.02)	4.16	2.35	7.36	Sexual or physical violence from police	unlawful enforcement	Clients or other perpetrators	Partial	5	1.42552	0.854415	1.99606	0.291236	Sexual or physical violence from police					NA	NA	NA	1	NA	NA
16		Shannon, 2009	Shannon, 2009 (5)	0	Canada	237	FSW	Prospective cohort	Prior assault by police	Sexual or physical coercion	Clients perpetrated sexual or physical violence	Violence		Sexual/physical violence (client)	Prevalent					4.16 (2.35-7.36)	3.45 (1.98-6.02)	3.45	1.98	6.02	Sexual or physical violence from police	unlawful enforcement	Clients or other perpetrators	Partial	5	1.23837	0.683097	1.79509	0.283671	Sexual or physical violence from police					NA	NA	NA	1	NA	NA
16		Shannon, 2009	Shannon, 2009 (8)	1	Canada	237	FSW	Prospective cohort	Prior assault by police	Sexual or physical coercion	Have you been forced to have sex (penetrative) against your will (excluding clients) in the last 6 months?	Violence		Sexual violence (others)	Prevalent					3.12 (1.61-6.04)	2.61 (1.32-5.16)	3.12	1.61	6.04	Sexual or physical violence from police	unlawful enforcement	Intimate partners	Partial	8	1.13783	0.476234	1.7984	0.337288	Sexual or physical violence from police					NA	NA	NA	NA	NA	NA
16		Shannon, 2009	Shannon, 2009 (8)	0	Canada	237	FSW	Prospective cohort	Prior assault by police	Sexual or physical coercion	Have you been forced to have sex (penetrative) against your will (excluding clients) in the last 6 months?	Violence		Sexual violence (others)	Prevalent					3.12 (1.61-6.04)	2.61 (1.32-5.16)	2.61	1.32	5.16	Sexual or physical violence from police	unlawful enforcement	Intimate partners	Partial	8	0.95935	0.277632	1.64094	0.347782	Sexual or physical violence from police					NA	NA	NA	NA	NA	NA
16		Shannon, 2009	Shannon, 2009 (9)	1	Canada	237	FSW	Prospective cohort	Prior assault by police	Sexual or physical coercion	Have you been physically abused by someone (excluding clients) in the last 6 months? (includes partner, pimp, dealer, police, security guard, stranger or other)	Violence		Physical violence (others)	Prevalent					2.65 (0.95-3.87)	2.23 (0.78-3.650	2.65	0.95	3.87	Sexual or physical violence from police	unlawful enforcement	Intimate partners	Partial	9	0.97456	-0.0512933	1.35325	0.358303	Sexual or physical violence from police					NA	NA	NA	NA	NA	NA
16		Shannon, 2009	Shannon, 2009 (9)	0	Canada	237	FSW	Prospective cohort	Prior assault by police	Sexual or physical coercion	Have you been physically abused by someone (excluding clients) in the last 6 months? (includes partner, pimp, dealer, police, security guard, stranger or other)	Violence		Physical violence (others)	Prevalent					2.65 (0.95-3.87)	2.23 (0.78-3.650	2.23	0.78	3.65	Sexual or physical violence from police	unlawful enforcement	Intimate partners	Partial	9	0.802002	-0.248461	1.29473	0.393671	Sexual or physical violence from police					NA	NA	NA	NA	NA	NA
17		Qiao, 2014	Qiao, 2014 (2)	1	China	794	FSW	Cross sectional	Ever been arrested by police	ever arrest	Inconsistent condom use with clients in the past month	Condom use	Last month	Any condomless sex (client)						0.77 (0.41-1.50)	n/a	1.2987	0.666667	2.27273	Ever experienced arrest or prison	lawful enforcement	Clients or others	Full	2	0.261365	-0.405465	0.820981	0.312869	Ever experienced lawful/unlawful arrest or prison				Clients or others	NA	NA	NA	NA	NA	1	NA
17		Qiao, 2014	Qiao, 2014 (1)	1	China	794	FSW	Cross sectional	Fear of being arrested by the police	fear	Inconsistent condom use with clients in the past month	Condom use	Last month	Any condomless sex (client)						1.9 (1.45-2.62)	1.60 (1.04-2.45)	0.512821	0.381679	0.689655	Fear of police repression	lawful enforcement	Clients or others	Full	1	-0.667829	-0.963174	-0.371564	0.150921	Fear of police repression				Clients or others	NA	NA	NA	NA	NA	NA	NA
17		Qiao, 2014	Qiao, 2014 (1)	0	China	794	FSW	Cross sectional	Fear of being arrested by the police	fear	Inconsistent condom use with clients in the past month	Condom use	Last month	Any condomless sex (client)						1.9 (1.45-2.62)	1.60 (1.04-2.45)	0.626174	0.408664	0.961538	Fear of police repression	lawful enforcement	Clients or others	Full	1	-0.468127	-0.894863	-0.0392207	0.142759	Fear of police repression				Clients or others	NA	NA	NA	NA	NA	NA	NA
18		Zhang, 2013	Zhang, 2013 (1)	0	China	720	FSW	Cross sectional	Police arrest	ever arrest	unprotected sex in the last sex act with clients	Condom use	Last sex	Condomless sex (client)						n/a	2.55 (1.40-4.65)	2.55	1.4	4.65	Ever experienced arrest or prison	lawful enforcement	Clients or others	Full	1	0.936093	0.336472	1.53687	0.306223	Ever experienced lawful/unlawful arrest or prison				Clients or others	NA	NA	NA	NA	1	1	1
19		Avila, 2017	Avila, 2017	0	Argentina	273	Trans women SW	Cross sectional	Were under arrest because of sex work activity	recent arrest	HIV	HIVSTI		HIV infection	Prevalent					1.42 (0.82-2.47)	NS	1.42	0.82	2.47	Recent arrest or prison	lawful enforcement			1	0.350657	-0.198451	0.904218	0.281293	Recent lawful/unlawful arrest or prison	0	1	0		1	1	NA	NA
19		Avila, 2017	Avila, 2017	0	Argentina	273	Trans women SW	Cross sectional	Were under arrest because of sex work activity	recent arrest	Syphilis	HIVSTI		Syphilis	Prevalent					2.4 (1.39-4.17)	NS	2.47	1.39	4.17	Recent arrest or prison	lawful enforcement			2	0.904218	0.329304	1.42792	0.280258	Recent lawful/unlawful arrest or prison	0	0	1		0	0	NA	NA
20		Lyons, 2017	Lyons, 2017	0	Cote D'Ivoire	466	FSW	Cross sectional	Ever arrested	ever arrest	Physical violence is defined as ever having been violently pushed, shoved, slapped, hit, kicked, choked, or otherwise physically hurt.	Violence	Ever	Physical violence (any)	Prevalent					2.96 (1.89-4.63)	2.79 (1.77-4.41)	2.96	1.89	4.63	Ever experienced arrest or prison		Any			1.08519	0.636577	1.53256	0.228566	Ever experienced lawful/unlawful arrest or prison	NA	NA	NA		NA	NA	1	1
20		Lyons, 2017	Lyons, 2017	1	Cote D'Ivoire	466	FSW	Cross sectional	Ever arrested	ever arrest	Physical violence is defined as ever having been violently pushed, shoved, slapped, hit, kicked, choked, or otherwise physically hurt.	Violence	Ever	Physical violence (any)	Prevalent					2.96 (1.89-4.63)	2.79 (1.77-4.41)	2.79	1.77	4.41	Ever experienced arrest or prison		Any			1.02604	0.57098	1.48387	0.232881	Ever experienced lawful/unlawful arrest or prison	NA	NA	NA		NA	NA	1	1
20		Lyons, 2017	Lyons, 2017	0	Cote D'Ivoire	466	FSW	Cross sectional	Ever in prison	ever prison	Physical violence is defined as ever having been violently pushed, shoved, slapped, hit, kicked, choked, or otherwise physically hurt.	Violence	Ever	Physical violence (any)	Prevalent					2.23 (0.69-7.21)	n/a	2.23	0.69	7.21	Ever experienced arrest or prison		Any			0.802002	-0.371064	1.97547	0.598605	Ever experienced lawful/unlawful arrest or prison	NA	NA	NA		NA	NA	NA	0
20		Lyons, 2017	Lyons, 2017	1	Cote D'Ivoire	466	FSW	Cross sectional	Ever in prison	ever prison	Physical violence is defined as ever having been violently pushed, shoved, slapped, hit, kicked, choked, or otherwise physically hurt.	Violence	Ever	Physical violence (any)	Prevalent					2.23 (0.69-7.21)	n/a	NA	NA	NA	Ever experienced arrest or prison		Any			NA	NA	NA	NA	Ever experienced lawful/unlawful arrest or prison	NA	NA	NA		NA	NA	NA	0
20		Lyons, 2017	Lyons, 2017	0	Cote D'Ivoire	466	FSW	Cross sectional	Been harassed or intimidated by the police because of selling sex	harrassment	Physical violence is defined as ever having been violently pushed, shoved, slapped, hit, kicked, choked, or otherwise physically hurt.	Violence	Ever	Physical violence (any)	Prevalent					3.17 (2.07-4.81)	2.86 (1.85-4.41)	3.17	2.07	4.81	Police repression on sex work environment		Any			1.15373	0.727549	1.5707	0.215089	Police repression on sex work environment	NA	NA	NA		NA	NA	NA	1
20		Lyons, 2017	Lyons, 2017	1	Cote D'Ivoire	466	FSW	Cross sectional	Been harassed or intimidated by the police because of selling sex	harrassment	Physical violence is defined as ever having been violently pushed, shoved, slapped, hit, kicked, choked, or otherwise physically hurt.	Violence	Ever	Physical violence (any)	Prevalent					3.17 (2.07-4.81)	2.86 (1.85-4.41)	2.86	1.85	4.41	Police repression on sex work environment		Any			1.05082	0.615186	1.48387	0.221604	Police repression on sex work environment	NA	NA	NA		NA	NA	NA	1
20		Lyons, 2017	Lyons, 2017	0	Cote D'Ivoire	466	FSW	Cross sectional	Feel like the police refuse protection because of selling sex		Physical violence is defined as ever having been violently pushed, shoved, slapped, hit, kicked, choked, or otherwise physically hurt.	Violence	Ever	Physical violence (any)	Prevalent					3.03 (1.90-4.83)	2.75 (1.71-4.44)	3.03	1.9	4.83	Police repression on sex work environment		Any			1.10856	0.641854	1.57485	0.238008	Police repression on sex work environment	NA	NA	NA		NA	NA	NA	NA
20		Lyons, 2017	Lyons, 2017	1	Cote D'Ivoire	466	FSW	Cross sectional	Feel like the police refuse protection because of selling sex		Physical violence is defined as ever having been violently pushed, shoved, slapped, hit, kicked, choked, or otherwise physically hurt.	Violence	Ever	Physical violence (any)	Prevalent					3.03 (1.90-4.83)	2.75 (1.71-4.44)	2.75	1.71	4.44	Police repression on sex work environment		Any			1.0116	0.536493	1.49065	0.243408	Police repression on sex work environment	NA	NA	NA		NA	NA	NA	NA
20		Lyons, 2017	Lyons, 2017	0	Cote D'Ivoire	466	FSW	Cross sectional	Ever arrested	ever arrest	Sexual violence was defined as ever experiencing forced sex through physical force, coercion, or penetration with an object against one’s will.	Violence	Ever	Sexual violence (any)	Prevalent					2.62 (1.72-4.01)	2.60 (1.65-4.90)	2.62	1.72	4.01	Ever experienced arrest or prison		Any			0.963174	0.542324	1.38879	0.215935	Ever experienced lawful/unlawful arrest or prison	NA	NA	NA		NA	NA	0	0
20		Lyons, 2017	Lyons, 2017	1	Cote D'Ivoire	466	FSW	Cross sectional	Ever arrested	ever arrest	Sexual violence was defined as ever experiencing forced sex through physical force, coercion, or penetration with an object against one’s will.	Violence	Ever	Sexual violence (any)	Prevalent					2.62 (1.72-4.01)	2.60 (1.65-4.90)	2.6	1.65	4.9	Ever experienced arrest or prison		Any			0.955511	0.500775	1.58924	0.277668	Ever experienced lawful/unlawful arrest or prison	NA	NA	NA		NA	NA	0	0
20		Lyons, 2017	Lyons, 2017	0	Cote D'Ivoire	466	FSW	Cross sectional	Ever in prison	ever prison	Sexual violence was defined as ever experiencing forced sex through physical force, coercion, or penetration with an object against one’s will.	Violence	Ever	Sexual violence (any)	Prevalent					3.44 (1.06-11.13)	4.51 (1.23-16.46)	3.44	1.06	11.13	Ever experienced arrest or prison		Any			1.23547	0.0582689	2.40964	0.599841	Ever experienced lawful/unlawful arrest or prison	NA	NA	NA		NA	NA	NA	0
20		Lyons, 2017	Lyons, 2017	1	Cote D'Ivoire	466	FSW	Cross sectional	Ever in prison	ever prison	Sexual violence was defined as ever experiencing forced sex through physical force, coercion, or penetration with an object against one’s will.	Violence	Ever	Sexual violence (any)	Prevalent					3.44 (1.06-11.13)	4.51 (1.23-16.46)	4.51	1.23	16.46	Ever experienced arrest or prison		Any			1.5063	0.207014	2.80093	0.661714	Ever experienced lawful/unlawful arrest or prison	NA	NA	NA		NA	NA	NA	0
20		Lyons, 2017	Lyons, 2017	0	Cote D'Ivoire	466	FSW	Cross sectional	Been harassed or intimidated by the police because of selling sex	harrassment	Sexual violence was defined as ever experiencing forced sex through physical force, coercion, or penetration with an object against one’s will.	Violence	Ever	Sexual violence (any)	Prevalent					1.80 (1.86-4.19)	2.53 (1.68-3.90)	1.86	1.8	4.19	Police repression on sex work environment		Any			0.620576	0.587787	1.4327	0.207175	Police repression on sex work environment	NA	NA	NA		NA	NA	NA	0
20		Lyons, 2017	Lyons, 2017	1	Cote D'Ivoire	466	FSW	Cross sectional	Been harassed or intimidated by the police because of selling sex	harrassment	Sexual violence was defined as ever experiencing forced sex through physical force, coercion, or penetration with an object against one’s will.	Violence	Ever	Sexual violence (any)	Prevalent					1.80 (1.86-4.19)	2.53 (1.68-3.90)	2.53	1.68	3.9	Police repression on sex work environment		Any			0.928219	0.518794	1.36098	0.214843	Police repression on sex work environment	NA	NA	NA		NA	NA	NA	0
20		Lyons, 2017	Lyons, 2017	0	Cote D'Ivoire	466	FSW	Cross sectional	Feel like the police refuse protection because of selling sex		Sexual violence was defined as ever experiencing forced sex through physical force, coercion, or penetration with an object against one’s will.	Violence	Ever	Sexual violence (any)	Prevalent					3.14 (2.01-4.89)	2.98 (1.86-4.80)	3.14	2.01	4.89	Police repression on sex work environment		Any			1.14422	0.698135	1.58719	0.2268	Police repression on sex work environment	NA	NA	NA		NA	NA	NA	NA
20		Lyons, 2017	Lyons, 2017	1	Cote D'Ivoire	466	FSW	Cross sectional	Feel like the police refuse protection because of selling sex		Sexual violence was defined as ever experiencing forced sex through physical force, coercion, or penetration with an object against one’s will.	Violence	Ever	Sexual violence (any)	Prevalent					3.14 (2.01-4.89)	2.98 (1.86-4.80)	2.98	1.86	4.8	Police repression on sex work environment		Any			1.09192	0.620576	1.56862	0.241847	Police repression on sex work environment	NA	NA	NA		NA	NA	NA	NA
21		Goldenberg, 2016	Goldenberg, 2016	0	Uganda		FSW	Cross sectional	Ever in prison	ever prison	HIV	HIVSTI		HIV infection	Prevalent					1.67(1.06-2.64)	1.93(1.17-3.20)	1.67	1.06	2.64	Ever experienced arrest or prison					0.512824	0.0582689	0.970779	0.232783	Ever experienced lawful/unlawful arrest or prison	NA	1	0		1	1	NA	NA
21		Goldenberg, 2016	Goldenberg, 2016	1	Uganda		FSW	Cross sectional	Ever in prison	ever prison	HIV	HIVSTI		HIV infection	Prevalent					1.67(1.06-2.64)	1.93(1.17-3.20)	1.93	1.17	3.2	Ever experienced arrest or prison					0.65752	0.157004	1.16315	0.25667	Ever experienced lawful/unlawful arrest or prison	NA	1	0		1	1	NA	NA
21		Goldenberg, 2016	Goldenberg, 2016	0	Uganda		FSW	Cross sectional	Rushed client negotiation because of police presence	rushed negotiation	HIV	HIVSTI		HIV infection	Prevalent					0.99(0.64-1.52)	n/a	0.99	0.64	1.52	Police repression on sex work environment					-0.0100503	-0.446287	0.41871	0.220663	Police repression on sex work environment	NA	0	0		0	1	NA	NA
21		Goldenberg, 2016	Goldenberg, 2016	1	Uganda		FSW	Cross sectional	Rushed client negotiation because of police presence	rushed negotiation	HIV	HIVSTI		HIV infection	Prevalent					0.99(0.64-1.52)	n/a	NA	NA	NA	Police repression on sex work environment					NA	NA	NA	NA	Police repression on sex work environment	NA	0	0		0	1	NA	NA
22		Prangnell, 2018	Prangnell, 2018	0	Canada		FSW IDU	Prospective cohort	Stopped, searched or detained by police	ever arrest	Sexual and physical violence	Violence		Sexual/physical violence (any)	Prevalent					3.24 (1.78-5.88)	2.42 (1.33-4.40)	3.24	1.78	5.88	Ever experienced arrest or prison					1.17557	0.576613	1.77156	0.304832	Ever experienced lawful/unlawful arrest or prison	NA	NA	NA		NA	NA	1	1
22		Prangnell, 2018	Prangnell, 2018	1	Canada		FSW IDU	Prospective cohort	Stopped, searched or detained by police	ever arrest	Sexual and physical violence	Violence		Sexual/physical violence (any)	Prevalent					3.24 (1.78-5.88)	2.42 (1.33-4.40)	2.42	1.33	4.4	Ever experienced arrest or prison					0.883768	0.285179	1.4816	0.305211	Ever experienced lawful/unlawful arrest or prison	NA	NA	NA		NA	NA	1	1
